# Supplementary material for: Remote sensing data processing by multivariate regression analysis method for iron mineral resource potential mapping: A case study in Sarvian area, central Iran
Source: Copernicus journal article supplement (doi:10.5194/se-2017-25), 2017-03-13
Supplement: Supplementary file [file se-2017-25-RC1-supplement.pdf]

(This file contains suggested edits, and some comments. Equations were left out for simplicity. Yellow highlights mark places where I cannot understand what is meant.)

Colin Pain

## Remote sensing data processing by multivariate regression analysis method for iron mineral resource potential mapping: A case study in the Sarvian area, central Iran,

Deleted: .

Edris Mansouri<sup>1</sup>, Faranak Feizi<sup>2\*</sup>, Alireza Jafari Rad<sup>3</sup>, Mehran Arian<sup>4</sup>

1- Department of Geology, Science and Research Branch, Islamic Azad University, Tehran, Iran

2- Department of Mining Engineering, South Tehran Branch, Islamic Azad University, Tehran, Iran

3- Department of Geology, Science and Research branch, Islamic Azad University, Tehran, Iran

4- Department of Geology, Science and Research Branch, Islamic Azad University, Tehran, Iran

\*corresponding author

Fax number: +98 021 88830012; Cell: +98 912 3006753; [faranakfeizi@gmail.com](mailto:faranakfeizi@gmail.com).

### ABSTRACT

This paper uses multivariate regression to create a mathematical model for iron skarn exploration in the Sarvian area, central Iran, using multivariate regression for Mineral Prospectivity Mapping (MPM). The main target of this manuscript is to apply multivariate regression analysis (as an MPM method) to mapping iron outcrops in the northeast part of the study area in order to discover new iron deposits in other parts of the study area. Two types of multivariate regression models using two linear equations were employed to discover new mineral deposits. Aster satellite images (14 bands) were used as Unique Independent Variables (UIVs), and iron outcrops were mapped as dependent variables for MPM. According to the results of p-value,  $R^2$  and  $R^2_{adj}$ , the second regression model (which was a multiples and exponents of UIVs) fitted better than other models. The accuracy of the model was confirmed by iron outcrops map and geological observations. Based on field observation, iron mineralization occurs at the contact of limestone and intrusive rocks (skarn type). Iron minerals consist dominantly of magnetite, hematite and goethite.

Deleted: used

Deleted: (with reasonable accuracy)

Deleted: region of the interest and generalizing

Deleted: in

Deleted: field

Deleted: exert

Deleted: mapping from

Deleted: as

Deleted: The

Deleted: bands

Deleted: sets

Deleted: were used

Formatted: Highlight

Deleted: was the

Deleted: model

Deleted: versus

Deleted: Also

Deleted: as

**Key words:** Multivariate regression, Mineral Prospectivity Mapping, Iron, Sarvian

27 **1. INTRODUCTION**

28 **Diagnosing futuristic zones and finding new mineral deposits in the region of interest, is the**

**Formatted:** Highlight

29 **definitive main of mineral investigation.** One way to achieve this aim is **using** satellite image

**Formatted:** Highlight

**Deleted:** Using

30 processing for **Mineral Prospectivity Mapping (MPM)** (Carranza, 2008; Abedi et al., 2013;

**Deleted:** identify

31 Golshadi et al., 2016 and Feizi et al., 2012).

32 The utilization of satellite images for mineral investigation has been extremely effective in

33 indicating **the presence** of minerals. Likewise, remote sensing gives **a** synoptic view, which

**Deleted:** out

**Deleted:** attendance

34 is useful **for identifying** and **delineating** different **landscapes**, linear features, and

**Deleted:** the

**Deleted:** in distinguishing proof

35 structural elements (Feizi and Mansouri, 2013b).

**Deleted:** delineation

**Deleted:** of

36 The main objective of this **research was** to use multivariate regression analysis (as a MPM

**Deleted:** land frames

**Deleted:** manuscript is

37 method) to **use** pixel values **from** Aster satellite images **of the** north-east part of the study area to identify

**Deleted:** of

**Deleted:** from

38 new iron deposits in other parts. Two types of multivariate regression models **were used** to find new

**Deleted:** utilized

39 mineral deposits, using pixel values of Aster satellite image bands (14 bands) **as** Unique

**Deleted:** sets

40 Independent Variables (UIVs), and **iron** outcrop **areas** (digitized **a 1:5000** geology map of **the** study area

**Deleted:** Iron

**Deleted:** surface

**Deleted:** by

41 **and field** data as dependent variables.

**Deleted:** (scale 1:5000)

**Deleted:** check

**Deleted:** )

42 **Regression analyses have been utilized as a part of numerous logical fields, such as**

**Formatted:** Highlight

43 **geosciences.**

**Formatted:** Highlight

44 **Multiple regression analyses have been used to identify** stream sediment anomalies,

**Deleted:** identification

**Deleted:** of

45 (e.g., Carranza, 2010a; Carranza, 2010b). Likewise, multivariate regression has been effectively

**Deleted:** have been used by multiple regression analyses

46 used by Granian et al. (2015) to display subsurface mineralization from lithogeochemical  
47 information. Granian et al. (2015) used four types of multivariate regression models to depict  
48 significant surface geochemical anomalies indicating subsurface gold mineralization  
49 utilizing borehole data as dependent variables and surface lithogeochemical data as independent  
50 variables.

Deleted: utilized

Deleted: utilized

Deleted: for acknowledgment

51 This paper uses multivariate regression to develop a useful and precise mathematical model  
52 of iron potential zones using remote sensing of the region of the interest.

Deleted: utilized

Deleted: make

Deleted: (with sensible

Deleted: precision) for

Deleted: investigation in

Deleted: and summing up

Deleted: multivariate regression in  
remote sensing field

## 55 2. STUDY AREA

56 The Sarvian area is in the Orumieh-Dokhtar magmatic arc in Central of Iran (Fig. 1a).

Deleted: located

57 This magmatic arc is the most important metallogenic area inside the district and hosts

Deleted: imperative

Deleted: the

58 large metal deposits such as lead, zinc, copper and iron (Feizi et al., 2016 and

Deleted: majority of the larger

Deleted: s

59 Feizi et al., 2017).

60 The study area is dominated by Eocene intrusive rocks and carbonates of the Qom formation.

Deleted: explored zone determined

61 Several types of metal and non-metal mineral ore deposits have been reported in the

Deleted: as of now

62 study area. According to the 1:100,000 geological map of Kahak, the lithology of this area includes

Deleted: part

63 cream limestone with intercalations of marls (Qom formation), dark green, andesitic-basaltic lava,

64 volcanic breccia, hyaloclastic limestone, green megaporphyritic andesitic-basaltic lava,

65 rhyodacitic domes, tonalite-quartzdiorite, microquartzdiorite-microquartzmonzo-diorite, granite-

66 granodiorite, altered light green, grey tuff, tuffaceous sandstone and shale with intercalation

Deleted: alteration of

67 of nummulitic sandy limestone and andesitic lava, and orbitolina-bearing, thick bedded to massive  
68 grey limestone.

Deleted: ,

Deleted: orbitolina bearing, thick bedded

69 (Aptian-Albian) (Feizi et al., 2016) (Fig. 1b).

Deleted: to massive

70 These relationships are demonstrated by the

Deleted: In view of the current confirmations and furthermore contact of intrusive bodies with carbonate

71 calcic iron skarn ore

Deleted: rocks (Qom arrangement) and Iron outcrops in the north-east of study area, Calcic

72 (Sarvian mine) in the northeast of study area (Feizi et al., 2017) (Fig. 2).

Deleted: is located

73

### 73 3. METHODS AND DATA

#### 74 3.1 Multivariate Regression

75 Regression analyses is a good statistical tool for analysing relationships among dependent and  
76 independent variables

Deleted: manner

77 (Granian et al., 2015).

Deleted: This strategy can show the conduct of an event (a dependent variable) in

78 In regression analyses, for dependent

Deleted: light of related variables (some independent variables).

79 variables ( $Y$ ) and independent variables ( $x_i$ ), the equation is:

Deleted: if a

80 (1)

81 Y can be a linear or non-linear function.

Deleted: could

Deleted: Linear regression is used for modeling mineral

82 For linear regression  $Y$  is defined as follows:

Deleted: prospectivity in the Sarvian area.

83 (2)

84

85 For this function, the constant factor is  $a_0$ , the random error is  $\epsilon$ , and the regression

86 coefficients are  $a_i$ . If there are  $n$  samples in a data set, for each sample  $t$  variables were

Deleted:

Deleted: were

87 measured. Thus, function (2) is as follows:

Deleted: can be

86

87 (3)

88

89

90 Equation (3) can be re-written as a matrix. The linear function matrix is:

91 (4)

92

93 (5)

94

95 The least squares technique is used for estimating  $[A]$  as the coefficient matrix, as follows:

96

97 (6)

98

99 The inverse of variance-covariance samples matrix is  $[\Sigma]^{-1}$  and the covariance matrix among

100 independent variable and samples is  $[C]$ . Thus, the regression coefficients model is

Deleted: by equation 6,

101 calculated from equation 6.

102 The following criteria were used for the regression analysis;

Deleted: In

Deleted: , some criteria are required to review. these criteria are as follows

103 1. The variance and the mean of the random error should be a constant value and zero,

104 respectively.

105 2. The coefficient of determination value ( $R^2$ ) should be examined. This value is calculated as

106 follows (Granian et al., 2015):

107

108 (7)

109

110 The mean of the variable (Y), value of the *i*th sample ( $Y_i$ ) and estimated value of the *i*th sample  
111 ( $\hat{Y}$ ) for dependent variables were used in equation 7. The calculated  $R^2$  value determined within  
112 [0, 1] range. The value of  $R^2$  is close to 1 for well fitted models.

113 1. Given the fact that adding independent variables to the model will increase the  $R^2$   
114 value, the adjusted determination coefficient ( $R^2_{adj}$ ) is defined as follows (Granian et al.,  
115 2015):

116 (8)

117 As it was mentioned, *n* is number of samples (or data) and *t* is the number of variables (or  
118 regression coefficients). If a set of explanatory variables are introduced into a regression one at a  
119 time, with the  $R^2_{adj}$  computed each time, the level at which  $R^2_{adj}$  reaches a maximum, and decreases  
120 afterward, would be a well fitted model.

121 2. In regression analyses, the model should be fitted to the data. Accordingly, the p-value of  
122 the regression model in the Analysis of variance (ANOVA) test should be acceptable (less  
123 than or equal to 0.05). Calculating the p-value of final coefficients for each model, may also  
124 help optimize and improve the model. This criterion could be applied after  
125 choosing the best model.

### 126 3.2. Geo-data Preparation

127 There are several iron ore bodies and one iron mine in the northeastern Sarvian study area.

128 The regional geological conditions of the area, suggest that

**Deleted:** According to

**Deleted:** increasing

**Deleted:** Also calculating

**Deleted:** could

**Deleted:** on

**Deleted:** ing

**Deleted:** improving

**Deleted:** considered

**Deleted:** 4

**Deleted:** SETS

**Deleted:** The

**Deleted:** skarn type located

**Deleted:** of

**Deleted:** There are several iron vein

**Deleted:** and outcrop in this area.  
According to

**Deleted:** the data set

129 the Sarvian iron mine is a good model for exploring the surrounding area. In this paper, a geology  
130 map of the

Deleted: of this

Deleted: satellite imagery

131 mine is used as a training area for satellite imagery. In the training area, this method can

Deleted: and map the geology of the mine

132 model the iron outcrops (a dependent variable) based on Aster satellite image bands

Deleted: (some

133 (independent variables) (Fig. 3).

134 **Figure 3 is about here.**

### 134 **3.2. REMOTE SENSING DATA (INDEPENDENT VARIABLES)**

Deleted: 4.1

Deleted: INDEPENDENT

135 The ASTER sensor was launched in December 1999 on board the Earth Observation System

Deleted: propelled

136 (EOS) US Terra satellite. ASTER

Deleted: to record sun powered radiation in 14 spectral bands (Table 1).

Deleted: The

137 provides high-resolution images of the land surface, water, ice, and clouds using three separate

Deleted: significant

Deleted: scales

138 sensor subsystems covering 14 multi-spectral bands from visible to thermal infrared (Table 1).

Deleted: visible

Deleted: short-wave IR

Deleted: thermal fR

139 Resolutions are 15m, 30m, and 90m in the Visible and Near Infrared (VNIR), Shortwave Infrared  
140 (SWIR), and Thermal Infrared (TIR),

Deleted: ASTER consists of three different subsystems; the Visible and Near Infrared (VNIR),

Deleted: the Shortwave Infrared (SWIR), and the Thermal Infrared (TIR). To find out more about each

141 respectively.

Deleted: module click on the item of interest (

142 For more information see

Formatted: Highlight

143 Feizi and Mansouri, (2013b) and Mansouri and Feizi, (2016).

Deleted: collection

Deleted: was

Formatted: Highlight

144 Several factors influence the signal measured at the sensor, for example, float of the sensor

Deleted: utilized

Deleted: and

145 radiometric calibration, and atmospheric and topographical effects. In this way, Aster data

Deleted: radiance correlation,

Deleted: dark subtract

146 were analysed using ENVI5.1 software to provide information such as wavelength, and log  
147 residuals

Deleted: by

Comment [CP1]: Please check to make sure I haven't changed what you want to say.

148 which are basic for multispectral analyses (Mansouri et al., 2015).

Deleted: ENVI5.1 software

Deleted: is

149 In this study after correction, the pixel size of SWIR and TIR bands based on VNIR3 band

Deleted: images, were utilized

Deleted: the

Deleted: s

Deleted: pixels



148 (Panchromatic band) was converted to 15 m. The layer stacking function was then used to build a new multiband

Deleted: eter,

Deleted: than use

149 file from georeferenced images of various pixel sizes, extents, and projections.

### 150 **3.3. MAPPING OF IRON OUPCROPS (DEPENDENT VARIABLE)**

Deleted: 4.2

151 There are several iron veins and outcrops around the iron ore skarn mine in the north-eastern

Deleted: The iron ore skarn type located in the northeastern of Sarvian area. There are several iron vein

152 part of the Sarvian area. Iron outcrops in the training area were mapped using a geological

Deleted: and outcrop in this area. In order to mapping of iron outcrops in the training area used from

153 map at a scale of 1:1000 of the iron ore deposit. The map was then field checked. The shape

Deleted: Geological map (1:1000 scale) of iron ore deposit and check field. For preparing of this layer, the

154 file layer of iron outcrops was converted to a raster file with a pixel size of 15 m.

Deleted: shape file layer of iron outcrops convert to raster file with pixel size of 15 meter.

### 155 **4. RESULTS OF REGRESSION ANALYSES**

Deleted: 5

156 Multiple, factorial, polynomial and

Deleted: IN THE STUDY AREA

157 response surface regressions have been utilized in many fields including the

Deleted: Regression analyses needs making proper models. Utilizing

Comment [CP2]: Is this what you mean?

158 geosciences (e.g. Granian et al., 2015). In this study; Model 1 (Y<sub>1</sub>) was generated as a

Deleted: reaction

159 multiple linear regression model and Model 2 (Y<sub>2</sub>) was created from Y<sub>1</sub> plus many UIVs. The

Deleted: as a part of numerous logical

Deleted: such as

160 formulas for the two models are presented in Table 2. Thus, two linear equations

Deleted: Thus,

Deleted: multiplied

161 (Y<sub>1</sub> and Y<sub>2</sub>) were used to discover new mineral deposits, using pixel values from ASTER satellite

Deleted: of

Deleted: mentioned

Deleted: So in summary

162 data as independent variables and a map of iron outcrops as dependent variables. Of the two models

Deleted: utilized

Deleted: of

Deleted: Aster

Deleted: image

163 proposed in this paper, model 2 has

Deleted: which were

164 106 coefficients (14 for UIVs, 1 as constant, 91 for multiples of UIVs) and model 1 has 15

Deleted: , had become more complexes respectively 1 to 2

165 coefficients (14 for UIVs, 1 as constant, 0 for multiples and exponents of UIVs) (Table 2).

166 Regression analyses were performed to assess the models in Table 2,

Deleted: For assessing

Deleted: which are exhibited

167 and the critical criteria mentioned above, were examined. The values of the R<sup>2</sup>, R<sup>2</sup><sub>adj</sub>

Deleted: regression analyses were performed

Deleted: which are

Deleted: before

168 and p-value from the ANOVA test of 2 multivariate regression models are provided in Table 3.

**Deleted:** of

169

170 Table 4 presents the calculated coefficients of independent variables in regression

**Deleted:** Also,

**Deleted:** is presented

171 models. Excluded independent variables are not mentioned in Table 4.

**Deleted:** Other

**Deleted:** which are

172 Excluded variables were those that

**Deleted:** were excluded variables

173 had no effect on iron mineralization and the mapped distribution of iron outcrops.

**Deleted:** The excluded variables have no effect on the models. This means that,

**Deleted:** didn't

**Deleted:** have any

**Deleted:** behavior

**Deleted:** map

174

## 175 5. DISCUSSION

**Deleted:** 6

176 We used several criteria to review the differences between the two models,

**Deleted:** For distinguishing the best model among 2 models, a few criteria are required to review.

177 Firstly, the variance and the mean of the random error were acceptable for both

**Deleted:** all of regression

178 models. Secondly, based on Table 4, the p-values of ANOVA test of the two

**Deleted:** 2 multivariate regression

179 models were equal to 0. For regression models the acceptable p-value should be less than or equal

180 to 0.05. Thus, this criterion confirmed the validity of the models without specifying the most

181 appropriate model.

182 The value of  $R^2$  is close to 1 for well fitted models. The  $R^2$  values of

**Deleted:** On the other hand,

183 regression models are presented in Table 3. Model  $Y_1$  has a lower  $R^2$  than,

**Deleted:** The

**Formatted:** Subscript

**Deleted:** lowest

**Deleted:** belongs to  $Y_1$  and the highest

184  $Y_2$ . Thus, the  $Y_2$  model is better than the  $Y_1$  model.

**Deleted:** belongs to

**Deleted:** from

185 Because adding independent variables to the model will increasing the  $R^2$  value,

**Deleted:** According to the fact that

186 the  $R^2_{adj}$  value should be checked. The  $R^2_{adj}$  values of regression models are presented in Table 3.

187 As mentioned above, if a set of variables are introduced into a regression, with the

**Deleted:** it was

**Deleted:** before

188  $R^2_{adj}$  computed each time, the level at which  $R^2_{adj}$  reaches a maximum, and decreases afterward,

189 would be a well-fitted model. So, according to Table 3, Y<sub>2</sub> is the fitted model versus other  
190 models. Thus, Y<sub>2</sub> regression model is the most appropriate model for Mineral Prospectivity  
191 Mapping.

**Deleted:** well  
**Deleted:** would be the  
**Comment [CP3]:** Is this correct?  
**Deleted:** Y<sub>4</sub>

192 Thus according to the results of p-value (ANOVA test), R<sup>2</sup> and R<sup>2</sup><sub>adj</sub>, the second regression  
193 model (Y<sub>2</sub>) would be the fitted model versus other models. For generating a mineral prospectivity  
194 map the model Y<sub>2</sub> was implemented in ArcGIS using the raster calculator tool. The normalized  
195 mineral prospectivity map of the study area is presented in Fig. 4.

**Deleted:** Second  
**Deleted:** the  
**Deleted:** formula of  
**Deleted:** performed  
**Deleted:** software by

196 To assess the accuracy of the selected model, the created prospectivity map was checked against  
197 the iron outcrops map in the northeast part of the study area (Fig. 5). The locations of iron  
outcrops

**Deleted:** exactness  
**Deleted:** by

198 is in close agreement with predictions from the mineral prospectivity map. In addition,  
199 three  
200 target areas with very high potential were checked for iron outcrops and the prospectivity map was  
confirmed

**Deleted:** have appropriate adoption with favorable areas of  
**Deleted:** the  
**Deleted:** adaption of prospectivity map with the iron outcrops in the northeast part of the study area,  
**Deleted:** favourability  
**Deleted:** ,

201 by geological observations (Fig. 6). Based on field observation iron mineralization occurs at  
202 contacts between limestone and intrusive rocks (skarn type). Iron mineralization consists  
dominantly of

**Deleted:** as  
**Deleted:** of  
**Deleted:** s

203 magnetite, hematite and goethite. Therefore, the accuracy of the mineral prospectivity map is  
confirmed

204 in the Sarvian area.

205

206 **6. CONCLUSION**

**Deleted:** 7

207

208 The conclusions of this manuscript are as follows.

Deleted: presented in summary

209 1) The application of multivariate regression analysis (as a MPM method) was confirmed in  
210 the Sarvian area. This paper used multivariate regression to create a mathematical model (with

211 reasonable accuracy) for iron mineral exploration in the region of interest.

Deleted: the interest and generalizing

212 multivariate regression in MPM field.

213 2) Two types of multivariate regression models, as two linear equations, were employed to  
discover new mineral deposits. According to the results of p-value,  $R^2$  and  $R^2_{adj}$ ,

214 , the second

215 regression model best fitted observations.

Deleted: was the

Deleted: model versus other models

216 3) The accuracy of the model was confirmed by iron outcrop mapping and geological

Deleted: Also

Deleted: s

217 observations. Based on field observation iron mineralization occurs in contacts between limestone  
and

Deleted: of

218 intrusive rocks (skarn type). Iron mineralization consists dominantly of magnetite, hematite and

Deleted: s

219 goethite.

## 220 ACKNOWLEDGEMENTS

221 The authors would like to thank Amirabbas Karbalaee Ramezani for his helpful suggestions.

222

223

## 224 REFERENCES

225 Carranza, E.J.M., 2008, Geochemical anomaly and mineral prospectivity mapping in GIS,

226 Handbook of Exploration and Environmental Geochemistry. Elsevier, Amsterdam, 368 p.

227 Carranza, E.J.M., 2010a, Catchment basin modelling of stream sediment anomalies revisited:

228 incorporation of EDA and fractal analysis. *Geochemistry: Exploration, Environment, Analysis*,  
229 10, 365-381.

230 Carranza, E.J.M., 2010b, Mapping of anomalies in continuous and discrete fields of stream  
231 sediment geochemical landscapes. *Geochemistry: Exploration, Environment, Analysis*, 10, 171-  
232 187.

233 Feizi, F. and Mansouri, E., 2012, Identification of Alteration Zones with Using ASTER Data

234 in [a Part of Qom Province, Central Iran](#). *Journal of Basic and Applied Scientific Research*, 2, 73-  
235 84.

Deleted: A

236 Feizi, F. and Mansouri, E., 2013a, Separation of Alteration Zones on ASTER Data and  
237 Integration with Drainage Geochemical Maps in Soltanieh, Northern Iran. *Open Journal of*  
238 *Geology*, 3, 134-142.

239 Feizi, F. and Mansouri, E., 2013b, Introducing the Iron Potential Zones Using Remote Sensing  
240 Studies in South of Qom Province, Iran. *Open Journal of Geology*, 3, 278-286.

241 Feizi, F., Mansouri, E. and KarbalaieRamezanali, A., 2016, Prospecting of Au by Remote  
242 Sensing and Geochemical Data Processing Using Fractal Modelling in Shishe-Botagh, Area (NW  
243 Iran). *Journal of the Indian Society of Remote Sensing*, 44, 539-552.

244 Feizi, F., KarbalaieRamezanali, A. and Mansouri, E., 2017, Calcic iron skarn prospectivity  
245 mapping based on fuzzy AHP method, a case Study in Varan area, Markazi province,  
246 Iran. *Geosciences Journal*, 21, 123-136.

247 Granian, H., Tabatabaei, S. H., Asadi, H. H. and Carranza, E. J. M., 2015, Multivariate  
248 regression analysis of lithochemical data to model subsurface mineralization: a case study from  
249 the Sari Gunay epithermal gold deposit, NW Iran. *Journal of Geochemical Exploration*, 148, 249-

250 258.

251 Golshadi, Z., KarbalaieRamezanali, A. and Kafaie, K., 2016, Interpretation of magnetic data  
252 in the Chenar-e Olya area of Asadabad, Hamedan, Iran, using analytic signal, Euler deconvolution,  
253 horizontal gradient and tilt derivative methods. *Bollettino di Geofisica Teorica ed Applicata*, 57,  
254 329-342.

255 Mansouri, E., Feizi, F. and KarbalaieRamezanali, A., 2015, Identification of magnetic  
256 anomalies based on ground magnetic data analysis using multifractal modelling: a case study in  
257 Qoja-Kandi, East Azerbaijan Province, Iran. *Nonlinear Processes in Geophysics*, 22, 579-587.

258 Mansouri, E., Feizi, F., 2016, Introducing Au potential areas, using remote sensing and  
259 geochemical data processing using fractal method in Chartagh, western Azarbijan -Iran, E.

260 Mansouri, F. Feizi, *Arch. Min. Sci.*, Vol., No 2, 397-414.

#### Figure captions

Fig. 1. a) The location of the Sarvian area in the Urumieh–Dokhtar magmatic belt, Iran b) Geological map of the Sarvian area (scale 1:25000).

Fig. 2. Location of the Sarvian iron mine in the study area

Fig. 3. a) Location of the training area, b) ASTER satellite image of the training area (RGB:4,6,8). c) Geological map (scale 1:1000) of the training area.

Fig. 4. Mineral prospectivity map of the Sarvian area.

Fig. 5. Mineral prospectivity map of the Sarvian area confirmed by iron outcrops.

Fig. 6. Mineral prospectivity map of the Sarvian area confirmed by check fields of the three target areas.

**Deleted:** in the study area

**Deleted:** Aster

**Deleted:** in

**Comment [CP4]:** Please explain the numbers in the legend.

**Deleted:** which

**Deleted:** which
